# Supplementary material
Source: Springer Nature journal article supplement (https://www.springermedizin.de/resource/supplementary/12990_2009_245_MOESM8_ESM.pdf/9612874)

**A**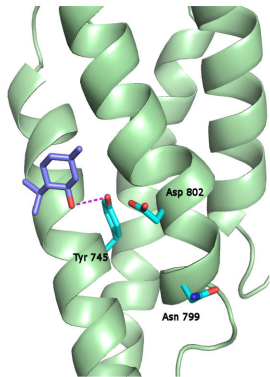**Menthol****B**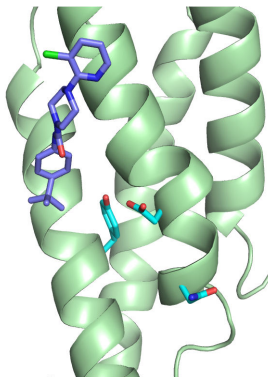**BCTC****C**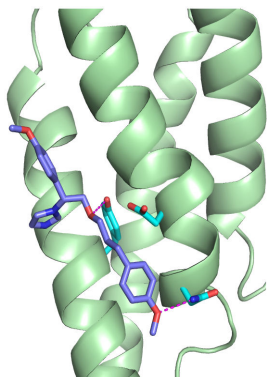**SKF96365**

Supplement: MOESM8 [file 9612874]
